# Supplementary material for: Feeding-dependent tentacle development in the sea anemone Nematostella vectensis
Source: PubMed Central journal article supplement (PMC7467937; doi:10.1038/s41467-020-18133-0), 2020-09-02
Supplement: 41467_2020_18133_MOESM6_ESM.pdf [file 41467_2020_18133_MOESM6_ESM.pdf]

## Reporting Summary

Nature Research wishes to improve the reproducibility of the work that we publish. This form provides structure for consistency and transparency in reporting. For further information on Nature Research policies, see [Authors & Referees](#) and the [Editorial Policy Checklist](#).

### Statistics

For all statistical analyses, confirm that the following items are present in the figure legend, table legend, main text, or Methods section.

n/a Confirmed

- |                                     |                                     |                                                                                                                                                                                                                                                            |
|-------------------------------------|-------------------------------------|------------------------------------------------------------------------------------------------------------------------------------------------------------------------------------------------------------------------------------------------------------|
| <input type="checkbox"/>            | <input checked="" type="checkbox"/> | The exact sample size ( $n$ ) for each experimental group/condition, given as a discrete number and unit of measurement                                                                                                                                    |
| <input type="checkbox"/>            | <input checked="" type="checkbox"/> | A statement on whether measurements were taken from distinct samples or whether the same sample was measured repeatedly                                                                                                                                    |
| <input type="checkbox"/>            | <input checked="" type="checkbox"/> | The statistical test(s) used AND whether they are one- or two-sided<br><i>Only common tests should be described solely by name; describe more complex techniques in the Methods section.</i>                                                               |
| <input checked="" type="checkbox"/> | <input type="checkbox"/>            | A description of all covariates tested                                                                                                                                                                                                                     |
| <input checked="" type="checkbox"/> | <input type="checkbox"/>            | A description of any assumptions or corrections, such as tests of normality and adjustment for multiple comparisons                                                                                                                                        |
| <input checked="" type="checkbox"/> | <input type="checkbox"/>            | A full description of the statistical parameters including central tendency (e.g. means) or other basic estimates (e.g. regression coefficient) AND variation (e.g. standard deviation) or associated estimates of uncertainty (e.g. confidence intervals) |
| <input type="checkbox"/>            | <input checked="" type="checkbox"/> | For null hypothesis testing, the test statistic (e.g. $F$ , $t$ , $r$ ) with confidence intervals, effect sizes, degrees of freedom and $P$ value noted<br><i>Give <math>P</math> values as exact values whenever suitable.</i>                            |
| <input checked="" type="checkbox"/> | <input type="checkbox"/>            | For Bayesian analysis, information on the choice of priors and Markov chain Monte Carlo settings                                                                                                                                                           |
| <input checked="" type="checkbox"/> | <input type="checkbox"/>            | For hierarchical and complex designs, identification of the appropriate level for tests and full reporting of outcomes                                                                                                                                     |
| <input checked="" type="checkbox"/> | <input type="checkbox"/>            | Estimates of effect sizes (e.g. Cohen's $d$ , Pearson's $r$ ), indicating how they were calculated                                                                                                                                                         |

*Our web collection on [statistics for biologists](#) contains articles on many of the points above.*

### Software and code

Policy information about [availability of computer code](#)

|                 |                                                                                                                                                                                                                                                                            |
|-----------------|----------------------------------------------------------------------------------------------------------------------------------------------------------------------------------------------------------------------------------------------------------------------------|
| Data collection | <input type="text" value="na"/>                                                                                                                                                                                                                                            |
| Data analysis   | <input type="text" value="ImageJ (version:2.0.0-rc-69/1.52p) was used for image processing; CHOPCHOP v2: https://chopchop.cbu.uib.no was used to design sgRNAs; Imaris x64 v 9.2.1 was used for 3D image reconstruction. Prism 8 was used for all statistical analysis."/> |

For manuscripts utilizing custom algorithms or software that are central to the research but not yet described in published literature, software must be made available to editors/reviewers. We strongly encourage code deposition in a community repository (e.g. GitHub). See the Nature Research [guidelines for submitting code & software](#) for further information.

### Data

Policy information about [availability of data](#)

All manuscripts must include a [data availability statement](#). This statement should provide the following information, where applicable:

- Accession codes, unique identifiers, or web links for publicly available datasets
- A list of figures that have associated raw data
- A description of any restrictions on data availability

### Field-specific reporting

Please select the one below that is the best fit for your research. If you are not sure, read the appropriate sections before making your selection.

## Life sciences study design

All studies must disclose on these points even when the disclosure is negative.

|                 |                                                                                                                                                                                                                                                                             |
|-----------------|-----------------------------------------------------------------------------------------------------------------------------------------------------------------------------------------------------------------------------------------------------------------------------|
| Sample size     | No Sample size calculation was performed. Progeny from nine independent spawning events were segregated into three groups, each containing approximately 1500 animals. These large groups were then further subdivided into more manageable populations of 250-350 animals. |
| Data exclusions | No data were excluded                                                                                                                                                                                                                                                       |
| Replication     | All experiments were repeated and the data presented in this study is based on at least two to three independent experiments. The number of repeats are given in the figure legends                                                                                         |
| Randomization   | Animals were randomly allocated into experimental groups                                                                                                                                                                                                                    |
| Blinding        | No Blinding was conducted. Experiments were performed by at least 2 independent investigators.                                                                                                                                                                              |

## Reporting for specific materials, systems and methods

We require information from authors about some types of materials, experimental systems and methods used in many studies. Here, indicate whether each material, system or method listed is relevant to your study. If you are not sure if a list item applies to your research, read the appropriate section before selecting a response.

### Materials & experimental systems

| n/a                                 | Involvement in the study                                        |
|-------------------------------------|-----------------------------------------------------------------|
| <input type="checkbox"/>            | <input checked="" type="checkbox"/> Antibodies                  |
| <input checked="" type="checkbox"/> | <input type="checkbox"/> Eukaryotic cell lines                  |
| <input checked="" type="checkbox"/> | <input type="checkbox"/> Palaeontology                          |
| <input type="checkbox"/>            | <input checked="" type="checkbox"/> Animals and other organisms |
| <input checked="" type="checkbox"/> | <input type="checkbox"/> Human research participants            |
| <input checked="" type="checkbox"/> | <input type="checkbox"/> Clinical data                          |

### Methods

| n/a                                 | Involvement in the study                        |
|-------------------------------------|-------------------------------------------------|
| <input checked="" type="checkbox"/> | <input type="checkbox"/> ChIP-seq               |
| <input checked="" type="checkbox"/> | <input type="checkbox"/> Flow cytometry         |
| <input checked="" type="checkbox"/> | <input type="checkbox"/> MRI-based neuroimaging |

## Antibodies

|                 |                                                                                                                                                                                                                                                                                                                                                                                                                                                                                                                                                                                                                                                                                                                  |
|-----------------|------------------------------------------------------------------------------------------------------------------------------------------------------------------------------------------------------------------------------------------------------------------------------------------------------------------------------------------------------------------------------------------------------------------------------------------------------------------------------------------------------------------------------------------------------------------------------------------------------------------------------------------------------------------------------------------------------------------|
| Antibodies used | Anti-pRPS6 Ser235/236 antibody (rabbit, dilution 1:50, Cell Signaling, clone D57.2.2E, #4858); rabbit anti-Phospho-Myosin Light Chain 2 (Ser19) Antibody (rabbit, dilution 1:50, Cell Signaling, # 3671); anti-eGFP (mouse, dilution 1:500, thermo fisher, clone 3E6, A-11120)                                                                                                                                                                                                                                                                                                                                                                                                                                   |
| Validation      | Anti-pRPS6 Ser235/236 antibody was validated by the vendor using Western blot analysis of extracts from PC12 and NIH/3T3 cells, treated with $\lambda$ phosphatase, 20% FBS (20 min) or 100 ng/ml PDGF (20 min). We also validate this antibody in vivo by immunostaining experiments and Rapamycin treatment.<br>Anti-Phospho-Myosin Light Chain 2 (Ser19) was validated by the vendor using Western blot analysis of extracts from HeLa cells, vehicle-treated (-) or treated with the myosin light chain kinase inhibitor ML-7 (50 $\mu$ M, 15 min; +).<br>Anti-eGFP was validated by the vendor using immunostaining in HeLa cell transfected with pShooter pCMV/myc/mito/GFP, then fixed and permeabilized. |

## Animals and other organisms

Policy information about [studies involving animals](#); [ARRIVE guidelines](#) recommended for reporting animal research

|                         |                                                                                                                                                           |
|-------------------------|-----------------------------------------------------------------------------------------------------------------------------------------------------------|
| Laboratory animals      | Males and females Laboratory strain of Nematostella vectensis were used in this study. The animals used in the experiments were between 2 to 3 weeks old. |
| Wild animals            | No wild animals were used in the study.                                                                                                                   |
| Field-collected samples | no field-collected samples were used in the study.                                                                                                        |
| Ethics oversight        | Experiment involving cnidarians do not require ethics oversight.                                                                                          |

Note that full information on the approval of the study protocol must also be provided in the manuscript.
