# Supplementary material for: Feeding-dependent tentacle development in the sea anemone Nematostella vectensis
Source: PubMed Central journal article supplement (PMC7467937; doi:10.1038/s41467-020-18133-0), 2020-09-02
Supplement: 41467_2020_18133_MOESM8_ESM.pdf [file 41467_2020_18133_MOESM8_ESM.pdf]

**Title: Supplementary Movie 1:**

**Description:** 3D view of an oral pole showing *Fgfrb* expression (green) visualized by mRNA *in situ* hybridization and trained nuclei (blue). The 3D view was reconstructed using Imaris x64 9.2.1 (full ref: Imaris v 9.2.1, ImarisXT, Bitplane AG, software available at <http://bitplane.com>)

**Title: Supplementary Movie 2:**

**Description:** 3D view of the oral pole for the *Fgfrb-eGFP* transgenic line stained with  $\alpha$ -eGFP (green) and Hoechst (blue).

**Title: Supplementary Movie 3:**

**Description:** ~Confocal z-stacks of the oral pole for a sibling polyp carrying the *Fgfrb-eGFP* transgene and stained with  $\alpha$ -eGFP (green), phalloidin (red) and Hoechst (blue). Scale bar is 50 $\mu$ m.

**Title: Supplementary Movie 4:**

**Description:** Confocal z-stacks of the oral pole for an *Fgfrb* mutant polyp carrying the *Fgfrb-eGFP* transgene and stained with  $\alpha$ -eGFP (green), phalloidin (red) and Hoechst (blue). Scale bar is 50 $\mu$ m.
